# Supplementary material
Source: PubMed Central journal article supplement (PMC1765424)

**A.**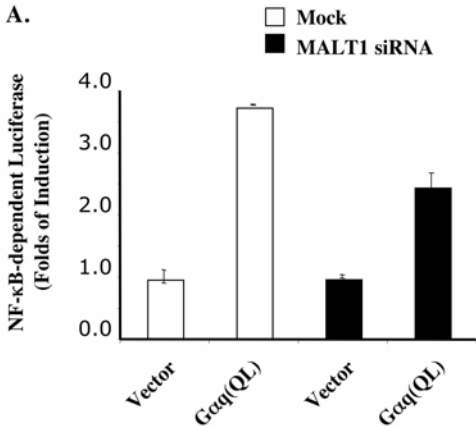**B. MALT1 siRNA**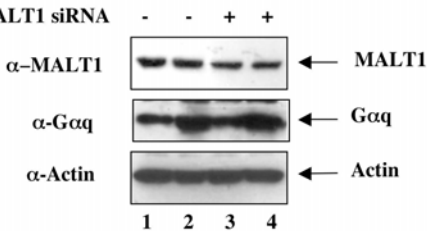

Supplement: pnas_0601894104_1.pdf [file pnas_0601894104_1.pdf]
